# Supplementary material for: A synthesis of high-efficiency Pd–Cu–Clx/Al2O3 catalyst for low temperature CO oxidation
Source: Royal Society of Chemistry journal article supplement (doi:10.1039/c0cc02776f), 2010-01-01
Supplement: c0cc02776f.pdf [file c0cc02776f.pdf]

# A synthesis of high-efficiency Pd-Cu-Cl<sub>x</sub>/Al<sub>2</sub>O<sub>3</sub> catalyst for low temperature CO oxidation

Yuxin Shen, Guanzhong Lu\*, Yun Guo\* and Yanqin Wang

Received (in XXX, XXX) Xth XXXXXXXXXX 200X, Accepted Xth XXXXXXXXXX 200X

First published on the web Xth XXXXXXXXXX 200X

DOI: 10.1039/b000000x

## Support information

### 1. Catalyst preparation

PdCl<sub>2</sub>-CuCl<sub>2</sub>/Al<sub>2</sub>O<sub>3</sub> (1.7wt.%Pd-3.3wt.%Cu-Cl<sub>x</sub>/Al<sub>2</sub>O<sub>3</sub>) was prepared by the NH<sub>3</sub> coordination-impregnation (CI) method. Weighed PdCl<sub>2</sub> (AR, Heraeus Materials Technology Shanghai Ltd.) and CuCl<sub>2</sub> (AR, Sinopharm Chemical Reagent Co., Ltd.) were dissolved in 2 ml ammonia aqueous solution (25%, Sinopharm Chemical Reagent Co., Ltd.) under ultrasonic at room temperature, and this PdCl<sub>2</sub> and CuCl<sub>2</sub> mixed solution was diluted to 8 ml with de-ionized water or isopropanol (AR, Sinopharm Chemical Reagent Co., Ltd.). Then 1 g Al<sub>2</sub>O<sub>3</sub> (WHA-204, BET surface area of 194 m<sup>2</sup>/g, from Wen-Zhou Jingjing aluminum Ltd.) was impregnated in this solution. After being aged for 24 h, the catalyst was dried at room temperature and calcined at 300 °C for 4 h. This process of preparing catalyst can be described as Fig.S1. The PdCl<sub>2</sub>-CuCl<sub>2</sub>/Al<sub>2</sub>O<sub>3</sub> catalyst prepared by the CI method is denoted as PC-CI/H<sub>2</sub>O or PC-CI/Isopropanol.

This catalyst was also prepared by the conventional wet impregnation (WI) method, in which de-ionized water and isopropanol were used as the diluter. The catalyst prepared was denoted as PC-WI/H<sub>2</sub>O or PC-WI/Isopropanol.

### 2. CO oxidation reaction

The activity of catalyst for CO oxidation was measured in a (Ø5 mm) quartz U-tube reactor, and 0.2g catalyst (20-40 mesh) was used and a glass wool was plugged in both sides of catalyst. The feed gas of 1500 ppm CO in air at a flow rate of 50 ml/min was directly through a water vapor saturator immersed in ice-water bath, and then flowed into the reactor. The concentration of moisture in the feed was about 1000 ppm. Changing the temperature of cold trap can adjust the concentration of moisture in the feed. After the steady operation for 10 min, the activity of catalyst was tested. The reaction temperature was controlled as follows: below room temperature was obtained by using ethanol/liquid nitrogen mixture in a vacuum bottle, and above room temperature was achieved by using warm water bath.

### 3. Catalysis characterization

The powder X-ray diffraction patterns (XRD) of the samples were performed on a Brook D8 focus diffraction spectrometer using CuKα radiation at room temperature. The average crystalline size was determined by the Scherrer formula based on the diffraction peak broadening.

H<sub>2</sub>-temperature programmed reduction (H<sub>2</sub>-TPR) was performed in a quartz U-tube with 100 mg catalyst. The catalysts prepared by CI were firstly pretreated in N<sub>2</sub> flow at 300 °C for 1 h, and then cooled down to room temperature; the catalysts prepared by WI were pretreated in N<sub>2</sub> flow at room temperature for 1 h. The reduction gas was consisted of 5% H<sub>2</sub>/N<sub>2</sub> (45 ml/min). The heating rate was 10 °C/min. The uptake amount of H<sub>2</sub> was measured by a thermal conductivity detector (TCD), which was calibrated by the quantitative reduction of CuO to the metallic copper.

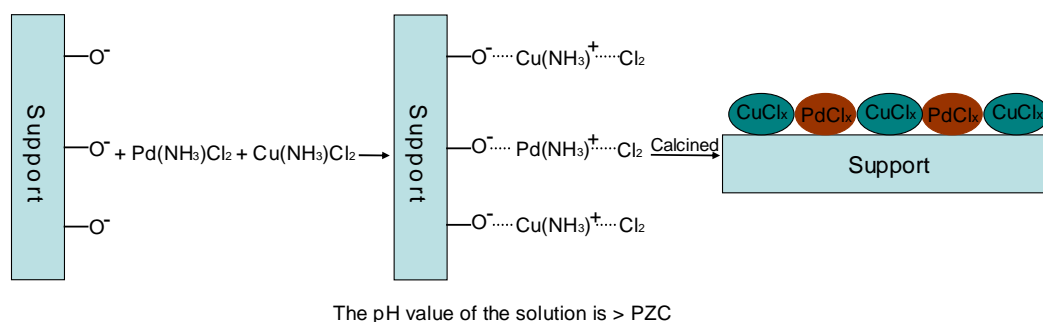

Fig.S1. Schematic representation of preparing catalyst by the NH<sub>3</sub> coordination-impregnation method.

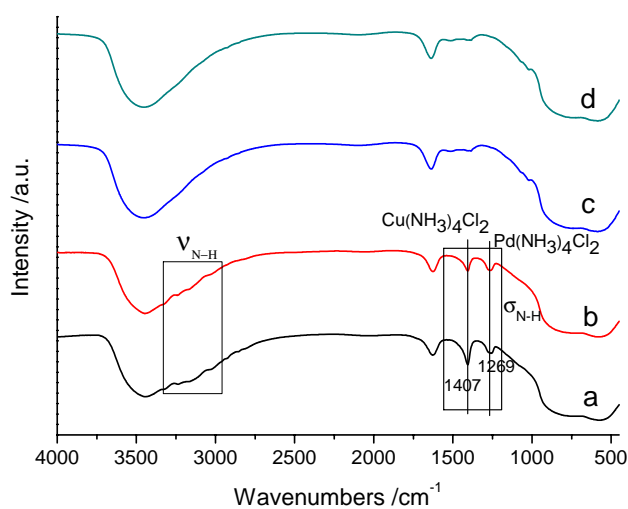

Fig.S2. FT-IR spectra of PC-Cl/H<sub>2</sub>O (a), PC-Cl/Isopropanol (b) before calcination, and PC-Cl/H<sub>2</sub>O (c) and PC-Cl/Isopropanol (d) after calcination.

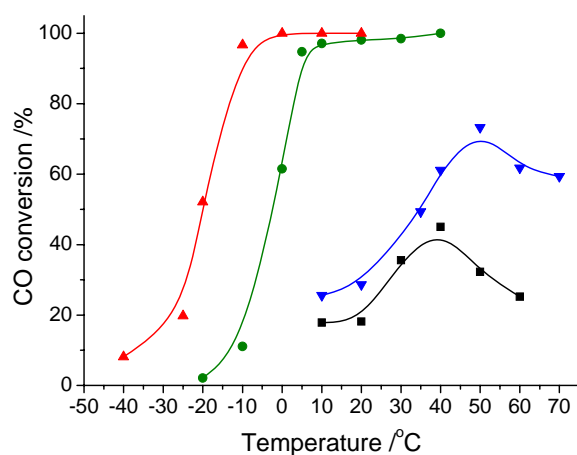

Fig. S3. Influence of preparation method on the activity of Pd-Cu-Cl<sub>2</sub>/Al<sub>2</sub>O<sub>3</sub> prepared by (●) Cl/H<sub>2</sub>O, (▲) Cl/Isopropanol, (■) WI/H<sub>2</sub>O, and (▼) WI/Isopropanol. (1500 ppm CO and ~ 6000 ppm H<sub>2</sub>O in air).

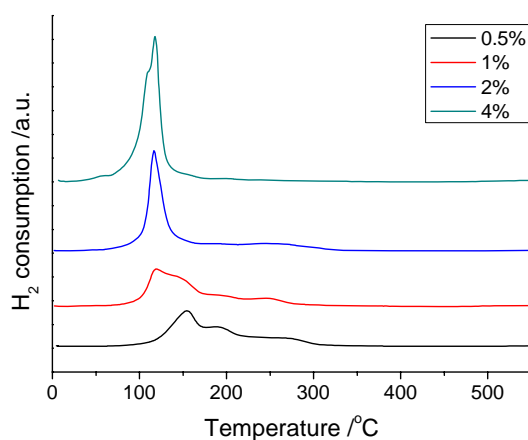

Fig. S4. TPR profiles of PC-Cl/Isopropanol with different Pd loadings and 3.3wt.%Cu in the synthesis solution.

**Table S1. Pd and Cu loadings, the crystalline size of copper phase, and H<sub>2</sub> consumption in TPR for Pd-Cu-Cl<sub>x</sub>/Al<sub>2</sub>O<sub>3</sub> catalysts**

| Catalyst               | Pd /wt.% <sup>a</sup> | Cu /wt.% <sup>a</sup> | Crystalline size /nm <sup>b</sup> | H <sub>2</sub> consumption / $\mu\text{mol/g}$ <sup>c</sup> |            |           |           |       |                          |
|------------------------|-----------------------|-----------------------|-----------------------------------|-------------------------------------------------------------|------------|-----------|-----------|-------|--------------------------|
|                        |                       |                       |                                   | $\alpha_1$                                                  | $\alpha_2$ | $\beta_1$ | $\beta_2$ | Total | Theoretical <sup>c</sup> |
| PC-WI/H <sub>2</sub> O | 1.4                   | 3.1                   | 34                                | 334                                                         | 281        | –         | –         | 615   | 620                      |
| PC-WI/Isopropanol      | 1.4                   | 3.2                   | 31                                | 346                                                         | 279        | –         | –         | 625   | 635                      |
| PC-Cl/H <sub>2</sub> O | 1.3                   | 3.2                   | 21                                | –                                                           | 99         | 254       | 279       | 632   | 625                      |
| PC-Cl/Isopropanol      | 1.2                   | 3.2                   | –                                 | –                                                           | –          | 454       | 167       | 621   | 616                      |

<sup>a</sup> Pd and Cu loadings were measured by an ICP-AES instrument (Varian 710);

<sup>b</sup> It is the crystalline sizes of Cu<sub>2</sub>Cl(OH)<sub>3</sub> in the catalysts, which were calculated from the (101) peak broadening of Cu<sub>2</sub>Cl(OH)<sub>3</sub> by Scherrer equation.

<sup>c</sup> Theoretical H<sub>2</sub> consumption was calculated according to the Pd and Cu loadings in the catalyst.

**Table S2. Apparent activation energy (E<sub>a</sub>) and specific reaction rate for CO oxidation over Pd-Cu-Cl<sub>x</sub>/Al<sub>2</sub>O<sub>3</sub> catalysts**

| Temperature /°C                      | Specific reaction rate* /mol g <sup>-1</sup> h <sup>-1</sup> × 10 <sup>3</sup> |                   |                        |                   |
|--------------------------------------|--------------------------------------------------------------------------------|-------------------|------------------------|-------------------|
|                                      | PC-WI/H <sub>2</sub> O                                                         | PC-WI/Isopropanol | PC-Cl/H <sub>2</sub> O | PC-Cl/Isopropanol |
| 60                                   | 2.4                                                                            | 2.3               | -                      | -                 |
| 50                                   | 1.7                                                                            | 2.1               | -                      | -                 |
| 40                                   | 0.97                                                                           | 1.2               | -                      | -                 |
| 30                                   | 0.81                                                                           | 0.83              | -                      | -                 |
| 0                                    | -                                                                              | -                 | 120                    | 180               |
| -25                                  | -                                                                              | -                 | 50                     | 51                |
| -40                                  | -                                                                              | -                 | 23                     | 29                |
| E <sub>a</sub> /kJ mol <sup>-1</sup> | 32                                                                             | 30                | 23                     | 23                |

\* The specific reaction rates were obtained after the reaction was run for 30 min. The feed gas consisted of 400 ppm CO, 1000 ppm H<sub>2</sub>O and air, and the hourly gas space velocity was in the range of  $1.5 \times 10^4 - 9 \times 10^5$  ml g<sup>-1</sup> h<sup>-1</sup>. The conversion of CO was adjusted to below 15% in order to calculate the reaction rates under different reaction conditions.
